# Supplementary material for: Exploring the Association Between COVID-19 Vaccination and Mental Disorder Risks: A Retrospective Cohort Study
Source: Research Square preprint supplement (doi:10.21203/rs.3.rs-5145501/v1), 2025-05-06
Supplement: Supplementary file 1 [file 0eec837d755ea44d7c7dbf90.docx]

| Table 1. Baseline characteristics of patients. | | | | | | | | |
| --- | --- | --- | --- | --- | --- | --- | --- | --- |
|  | Before matching | | | | After matching | | | |
| Patients who received COVID-19 vaccine (N=157,419) | Patients who did not receive COVID-19 vaccine (N=1,767,831) | SMD | **p-value** | Patients who received COVID-19 vaccine (N=157,393) | Patients who did not receive COVID-19 vaccine (N=157,393) | SMD | **p-value** |
| Demographics and lifestyle | | | | | | | | |
| Age at Index (Mean ± SD) (years) | 54.8 ± 20.4 | 49.80 ± 20.6 | 0.25 | <0.001 | 54.80 ± 20.4 | 54.60 ± 20.5 | 0.01 | 0.687 |
| Female (n, %) | 91,894 (58.4) | 999,864 (56.6) | 0.04 | <0.001 | 91,875 (58.4) | 93,160 (59.2) | 0.02 | 0.812 |
| White (n, %) | 87,207 (55.4) | 1,018,947 (57.6) | 0.05 | <0.001 | 87,204 (55.4) | 87,466 (55.6) | <0.01 | 0.884 |
| Black or African American (n, %) | 24,500 (15.6) | 322,109 (18.2) | 0.07 | <0.001 | 24,500 (15.6) | 23,656 (15.0) | 0.01 | 0.782 |
| Hispanic or Latino (n, %) | 20,987 (13.3) | 174,552 (9.9) | 0.10 | <0.001 | 20,983 (13.3) | 21,069 (13.4) | <0.01 | 0.927 |
| Asian (n, %) | 19,076 (12.1) | 96,240 (5.4) | 0.20 | <0.001 | 19,055 (12.1) | 19,438 (12.4) | 0.01 | 0.901 |
| BMI (Mean ± SD) (kg/m²) | 28.60 ± 6.8 | 29.60 ± 7.38 | 0.14 | <0.001 | 28.60 ± 6.8 | 29.40 ± 7.23 | 0.11 | 0.021 |
| Medicine Services and Procedures (Mean ± SD) | 104,036 ± 839.7 | 839,679 ± 47.5 | 0.42 | <0.001 | 104,010 ± 839.6 | 106,223 ± 67.5 | 0.01 | 0.913 |
| Underlying disease | | | | | | | | |
| Hypertensive diseases (n, %) | 58,824 (37.4) | 385,316 (21.8) | 0.38 | <0.001 | 58,800 (37.4) | 58,414 (37.1) | <0.01 | 0.940 |
| Ischemic heart diseases (n, %) | 20,324 (12.9) | 126,796 (7.2) | 0.18 | <0.001 | 20,313 (12.9) | 19,428 (12.3) | 0.01 | 0.821 |
| Chronic rheumatic heart diseases (n, %) | 6,441 (4.1) | 30,882 (1.7) | 0.13 | <0.001 | 6,429 (4.1) | 5,901 (3.7) | 0.01 | 0.769 |
| Metabolic disorders (n, %) | 65,684 (41.7) | 408,935 (23.1) | 0.39 | <0.001 | 65,658 (41.7) | 65,318 (41.5) | 0.01 | 0.752 |
| Diabetes mellitus (n, %) | 26,126 (16.6) | 174,331 (9.9) | 0.18 | <0.001 | 26,117 (16.6) | 25,317 (16.1) | 0.01 | 0.805 |
| Disorders of thyroid gland (n, %) | 22,330 (14.2) | 135,455 (7.7) | 0.17 | <0.001 | 22,312 (14.2) | 22,039 (14.0) | <0.01 | 0.886 |
| Chronic lower respiratory diseases (n, %) | 24,258 (15.4) | 165,300 (9.4) | 0.20 | <0.001 | 24,243 (15.4) | 24,056 (15.3) | <0.01 | 0.899 |
| Tuberculosis (n, %) | 418 (<0.1) | 1,502 (<0.1) | <0.01 | <0.001 | 408 (<0.1) | 355 (<0.1) | <0.01 | 0.914 |
| Episodic and paroxysmal disorders (n, %) | 32,687 (20.8) | 208,984 (11.8) | 0.20 | <0.001 | 32,663 (20.8) | 32,296 (20.5) | <0.01 | 0.892 |
| Degenerative diseases of the nervous system (n, %) | 1,602 (1.0) | 7,906 (0.4) | 0.07 | <0.001 | 1,597 (1.0) | 1,454 (0.9) | <0.01 | 0.745 |
| Polyneuropathies and other disorders of the peripheral nervous system (n, %) | 6,391 (4.1) | 31,109 (1.8) | 0.11 | <0.001 | 6,387 (4.1) | 5,825 (3.7) | <0.01 | 0.825 |
| Inflammatory diseases of the central nervous system (n, %) | 566 (<0.1) | 2,959 (<0.1) | <0.01 | <0.001 | 564 (<0.1) | 511 (<0.1) | <0.01 | 0.943 |
| Diseases of liver (n, %) | 11,367 (7.2) | 65,132 (3.7) | 0.13 | <0.001 | 11,356 (7.2) | 10,512 (6.7) | 0.01 | 0.782 |
| Functional dyspepsia (n, %) | 1,682 (1.1) | 8,220 (0.5) | 0.06 | <0.001 | 1,677 (1.1) | 1,516 (1.0) | <0.01 | 0.893 |
| Systemic connective tissue disorders (n, %) | 3,474 (2.2) | 19,028 (1.1) | 0.08 | <0.001 | 3,469 (2.2) | 3,192 (2.0) | <0.01 | 0.857 |
| Inflammatory polyarthropathies (n, %) | 12,482 (7.9) | 75,249 (4.3) | 0.12 | <0.001 | 12,475 (7.9) | 11,698 (7.4) | 0.01 | 0.851 |
| Acute kidney failure and chronic kidney disease (n, %) | 18,982 (12.1) | 112,331 (6.4) | 0.15 | <0.001 | 18,968 (12.1) | 17,859 (11.3) | 0.01 | 0.801 |
| Neoplasms (n, %) | 51,276 (32.6) | 292,932 (16.6) | 0.38 | <0.001 | 51,251 (32.6) | 50,927 (32.4) | <0.01 | 0.879 |
| Congenital malformations and chromosomal abnormalities (n, %) | 10,984 (7.0) | 66,207 (3.7) | 0.11 | <0.001 | 10,975 (7.0) | 10,468 (6.7) | <0.01 | 0.842 |
| External causes of morbidity (n, %) | 26,293 (16.7) | 221,049 (12.5) | 0.12 | <0.001 | 26,282 (16.7) | 25,041 (15.9) | 0.01 | 0.835 |
| Psychosocial related events | | | | | | | | |
| Problems related to housing and economic circumstances (n, %) | 809 (0.5) | 3,789 (0.2) | <0.01 | <0.001 | 805 (0.5) | 734 (0.5) | <0.01 | 0.856 |
| Problems related to social environment (n, %) | 726 (0.5) | 3,335 (0.2) | <0.01 | <0.001 | 717 (0.5) | 650 (0.4) | <0.01 | 0.873 |
| Problems related to primary support group (n, %) | 671 (0.4) | 2,939 (0.2) | <0.01 | <0.001 | 666 (0.4) | 616 (0.4) | <0.01 | 0.892 |
| Problems related to certain psychosocial circumstances (n, %) | 567 (0.4) | 3,225 (0.2) | <0.01 | <0.001 | 566 (0.4) | 569 (0.4) | <0.01 | 0.965 |
| Problems related to other psychosocial circumstances (n, %) | 568 (0.4) | 3,381 (0.2) | <0.01 | <0.001 | 565 (0.4) | 563 (0.4) | <0.01 | 0.983 |
| Problems related to employment and unemployment (n, %) | 239 (<0.1) | 1,615 (<0.1) | <0.01 | <0.001 | 238 (<0.1) | 239 (<0.1) | <0.01 | 0.997 |
| Problems related to upbringing (n, %) | 50 (<0.1) | 495 (<0.1) | <0.01 | <0.001 | 50 (<0.1) | 60 (<0.1) | <0.01 | 0.823 |
| Laboratory Measurements | | | | | | | | |
| Hemoglobin (Mean ± SD) (g/dL) | 13.0 ± 2.02 | 13.0 ± 2.04 | <0.01 | 0.915 | 13.0 ± 2.02 | 12.9 ± 2.05 | 0.02 | 0.781 |
| Creatinine (Mean ± SD) (mg/dL) | 1.02 ± 1.07 | 1.00 ± 1.46 | <0.01 | 0.845 | 1.02 ± 1.07 | 1.03 ± 1.38 | <0.01 | 0.912 |
| C-reactive protein (Mean ± SD) (mg/L) | 25.50 ± 51.3 | 26.40 ± 52.2 | 0.02 | 0.729 | 25.50 ± 51.2 | 25.40 ± 51.6 | <0.01 | 0.974 |
| Erythrocyte sedimentation rate (Mean ± SD) (mm/h) | 24.30 ± 24.6 | 23.40 ± 24.7 | 0.04 | 0.688 | 24.30 ± 24.6 | 24.50 ± 25.2 | <0.01 | 0.895 |
| Abbreviations: COVID-19: coronavirus disease 2019, BMI: body mass index, SMD: Standardized Mean Difference | | | | | | | | |
