# Supplementary material for: Exploring the Association Between COVID-19 Vaccination and Mental Disorder Risks: A Retrospective Cohort Study
Source: Research Square preprint supplement (doi:10.21203/rs.3.rs-5145501/v1), 2025-05-06
Supplement: Supplementary file 2 [file 0fa82861898fd57e0354247c.docx]

| Table 2. Outcomes between patients with/without COVID-19 vaccination in patients without COVID-19 infection before index date | | | | |
| --- | --- | --- | --- | --- |
|  | Patients without COVID-19 infection before index date | | | |
|  | Patients who received COVID-19 vaccine (N=157,393) | Patients who received COVID-19 vaccine (N=157,393) | Adjusted Hazard Ratio (95% CI) | Adjusted Hazard Ratio (95% CI) |
| **Mental, Behavioral and Neurodevelopmental disorders** | 11,152 (7.09%) | 9,514 (6.05%) | 1.11 (1.08, 1.14) | <0.001 |
| **Mood [affective] disorders** | 3,724 (2.37%) | 2,676 (1.70%) | 1.31 (1.25, 1.38) | <0.001 |
| **Anxiety, dissociative, stress-related, somatoform and other nonpsychotic mental disorders** | 5,732 (3.64%) | 4,389 (2.79%) | 1.23 (1.18, 1.28) | <0.001 |
| **Major depressive disorder or depressive episode** | 3,424 (2.18%) | 2,396 (1.52%) | 1.35 (1.28, 1.42) | <0.001 |
| **Bipolar disorder** | 161 (0.10%) | 177 (0.11%) | 0.86 (0.70, 1.07) | 0.168 |
| **Schizophrenia, schizotypal, delusional, and other non-mood psychotic disorders** | 168 (0.11%) | 220 (0.14%) | 0.72 (0.59, 0.88) | 0.001 |
| **Mental disorders due to known physiological conditions** | 1,303 (0.83%) | 1,204 (0.77%) | 1.02 (0.94, 1.10) | 0.068 |
| **Behavioral syndromes associated with physiological disturbances and physical factors** | 797 (0.51%) | 561 (0.36%) | 1.32 (1.19, 1.47) | <0.001 |
| **Disorders of adult personality and behavior** | 114 (0.07%) | 65 (0.04%) | 1.64 (1.21, 2.23) | 0.001 |
| **Intellectual Disabilities** | 41 (0.03%) | 43 (0.03%) | 0.90 (0.58, 1.37) | 0.644 |
| **Pervasive and specific developmental disorders** | 108 (0.07%) | 69 (0.04%) | 1.47 (1.09, 1.99) | 0.012 |
| **Behavioral and emotional disorders** | 431 (0.27%) | 248 (0.16%) | 1.63 (1.39, 1.91) | <0.001 |
| *Abbreviations: COVID-19: Coronavirus disease 2019, CI: confidence interval | | | | |
|  | | | | |
