# Supplementary material for: Exploring the Association Between COVID-19 Vaccination and Mental Disorder Risks: A Retrospective Cohort Study
Source: Research Square preprint supplement (doi:10.21203/rs.3.rs-5145501/v1), 2025-05-06
Supplement: Supplementary file 3 [file 6d217dfbc649473c957acd89.docx]

**Supplementary Online Content**

eMethod. Codes for cohort definition, outcomes, and baseline data in TriNetX

eTable 1. Outcomes between patients with/without COVID-19 vaccination (Male)

eTable 2. Outcomes between patients with/without COVID-19 vaccination (Female)

eTable 3. Outcomes between patients with/without COVID-19 vaccination (Age <40)

eTable 4. Outcomes between patients with/without COVID-19 vaccination (40≦Age <65)

eTable 5. Outcomes between patients with/without COVID-19 vaccination (Age≧65)

eTable 6. Outcomes between patients with/without COVID-19 vaccination without COVID-19 infection throughout lifetime

eTable 7. Outcomes between patients with/without COVID-19 vaccination (Global Collaborative Network)

eTable 8. Outcomes between patients with/without COVID-19 vaccination before COVID-19 infection

eFigure 1. Forest plot of patients with/without COVID-19 vaccination (Global Collaborative Network)

**eMethod. Codes for cohort definition, baseline data, and outcomes in TriNetX**

| Code Type | Code | Diagnosis or procedure |
| --- | --- | --- |
| Cohort definition | | |
| ICD-10-CM | U07.1 | COVID-19 |
| CVX | 213 | SARS-CoV-2 (COVID-19) Vaccine |
| LOINC | 94309-2 | SARS-CoV-2 (COVID-19) RNA [Presence] in Specimen by NAA with probe detection |
| LOINC | 94759-8 | SARS-CoV-2 (COVID-19) RNA [Presence] in Nasopharynx by NAA with probe detection |
| LOINC | 94500-6 | SARS-CoV-2 (COVID-19) RNA [Presence] in Respiratory system specimen by NAA with probe detection |
| LOINC | 94534-5 | SARS-CoV-2 (COVID-19) RdRp gene [Presence] in Respiratory system specimen by NAA with probe detection |
| LOINC | 94316-7 | SARS-CoV-2 (COVID-19) N gene [Presence] in Specimen by NAA with probe detection |
| ICD-10-CM | F01–F99 | Mental, Behavioral and Neurodevelopmental disorders |
| Baseline data | | |
| ICD-10-CM | E70–E88 | Metabolic disorders |
| ICD-10-CM | E08–E13 | Diabetes mellitus |
| ICD-10-CM | I10–I1A | Hypertensive diseases |
| ICD-10-CM | I20–I25 | Ischemic heart diseases |
| ICD-10-CM | I60–I69 | Cerebrovascular diseases |
| ICD-10-CM | I05–I09 | Chronic rheumatic heart diseases |
| ICD-10-CM | N17–N19 | Acute kidney failure and chronic kidney disease |
| ICD-10-CM | J40–J4A | Chronic lower respiratory diseases |
| ICD-10-CM | K70–K77 | Diseases of the liver |
| ICD-10-CM | C00–D49 | Neoplasms |
| ICD-10-CM | M05–M14 | Inflammatory polyarthropathies |
| ICD-10-CM | M30–M36 | Systemic connective tissue disorders |
| ICD-10-CM | G30–G32 | Degenerative diseases of the nervous system |
| ICD-10-CM | G60–G65 | Polyneuropathies and other peripheral nervous system disorders |
| ICD-10-CM | G00–G09 | Inflammatory diseases of the central nervous system |
| ICD-10-CM | E00–E07 | Disorders of the thyroid gland |
| ICD-10-CM | Q00–Q99 | Congenital malformations, deformations, and chromosomal abnormalities |
| ICD-10-CM | G40–G47 | Episodic and paroxysmal disorders |
| ICD-10-CM | K30 | Functional dyspepsia |
| ICD-10-CM | V00–Y99 | External causes of morbidity |
| ICD-10-CM | A15–A19 | Tuberculosis |
| ICD-10-CM | Z79 | Long-term (current) drug therapy |
| ICD-10-CM | Z59 | Problems related to housing and economic circumstances |
| ICD-10-CM | Z65 | Problems related to other psychosocial circumstances |
| ICD-10-CM | Z64 | Problems related to certain psychosocial circumstances |
| ICD-10-CM | Z63 | Other problems related to the primary support group, including family circumstances |
| ICD-10-CM | Z60 | Problems related to the social environment |
| ICD-10-CM | Z56 | Problems related to employment and unemployment |
| ICD-10-CM | Z62 | Problems related to upbringing and the primary support group |
| TNX Curated | 1012569 | Medicine services and procedures |
| TNX Curated | 9014 | Hemoglobin |
| TNX Curated | 9024 | Creatinine |
| TNX Curated | 9063 | C-reactive protein (CRP) |
| Outcomes | | |
| ICD-10-CM | F01-F09 | Mental disorders due to known physiological conditions |
| ICD-10-CM | F01-F99 | Mental, Behavioral and Neurodevelopmental disorders |
| ICD-10-CM | F20-F29 | Schizophrenia, schizotypal, delusional, and other non-mood psychotic disorders |
| ICD-10-CM | F30-F39 | Mood [affective] disorders |
| ICD-10-CM | F31 | Bipolar disorder |
| ICD-10-CM | F40-F48 | Anxiety, dissociative, stress-related, somatoform and other nonpsychotic mental disorders |
| ICD-10-CM | F50-F59 | Behavioral syndromes associated with physiological disturbances and physical factors |
| ICD-10-CM | F60-F69 | Disorders of adult personality and behavior |
| ICD-10-CM | F70-F79 | Intellectual Disabilities |
| ICD-10-CM | F80-F89 | Pervasive and specific developmental disorders |
| ICD-10-CM | F90-F98 | Behavioral and emotional disorders with onset usually occurring in childhood and adolescence |
| ICD-10-CM | F99-F99 | Unspecified mental disorder |

| eTable 1. Outcomes between patients with/without COVID-19 vaccination (Male) | | | | |
| --- | --- | --- | --- | --- |
| Outcomes after matching | Patients Who Received COVID-19 Vaccine (N=65,079) | Patients Who Did Not Receive COVID-19 Vaccine (N=65,079) | Adjusted Hazard Ratio (95% CI) | p-value |
| Mental, Behavioral and Neurodevelopmental Disorders | 4,484 (6.9%) | 4,051 (6.2%) | 1.04 (0.99–1.08) | 0.0855 |
| Mood [affective] disorders | 1,327 (2.0%) | 900 (1.4%) | 1.38 (1.27–1.51) | <0.001 |
| Anxiety, dissociative, stress-related, somatoform and other nonpsychotic mental disorders | 1,900 (2.9%) | 1,420 (2.2%) | 1.25 (1.17–1.34) | <0.001 |
| Mental disorders due to known physiological conditions | 646 (1.0%) | 591 (0.9%) | 1.02 (0.91–1.14) | 0.701 |
| Schizophrenia, schizotypal, delusional, and other non-mood psychotic disorders | 89 (0.1%) | 118 (0.2%) | 0.71 (0.54–0.93) | 0.014 |
| Behavioral syndromes associated with physiological disturbances and physical factors | 260 (0.4%) | 176 (0.3%) | 1.37 (1.13–1.65) | 0.001 |
| Disorders of adult personality and behavior | 52 (<0.1%) | 39 (<0.1%) | 1.24 (0.82–1.88) | 0.303 |
| Intellectual Disabilities | 19 (<0.1%) | 26 (<0.1%) | 0.69 (0.38–1.24) | 0.208 |
| Pervasive and specific developmental disorders | 54 (0.1%) | 58 (0.1%) | 0.88 (0.60–1.27) | 0.4787 |
| Bipolar disorder | 57 (0.1%) | 56 (0.1%) | 0.96 (0.66–1.39) | 0.818 |
| Major depressive disorder or depressive episode | 1,209 (1.9%) | 790 (1.2%) | 1.44 (1.31–1.57) | <0.001 |
| Behavioral and emotional disorders with onset usually occurring in childhood and adolescence | 174 (0.3%) | 131 (0.2%) | 1.24 (0.99–1.56) | 0.0617 |

| eTable 2. Outcomes between patients with/without COVID-19 vaccination (Female) | | | | |
| --- | --- | --- | --- | --- |
| Outcomes after matching | Patients who received COVID-19 vaccine (N=91,895) | Patients who did not receive COVID-19 vaccine (N=91,895) | Adjusted Hazard Ratio (95% CI) | p-value |
| Mental, Behavioral and Neurodevelopmental disorders | 6,601 (7.2%) | 5,400 (5.9%) | 1.162 (1.121–1.204) | <0.001 |
| Mood [affective] disorders | 2,367 (2.6%) | 1,761 (1.9%) | 1.275 (1.199–1.357) | <0.001 |
| Anxiety, dissociative, stress-related, somatoform and other nonpsychotic mental disorders | 3,801 (4.1%) | 2,875 (3.1%) | 1.253 (1.194–1.316) | <0.001 |
| Mental disorders due to known physiological conditions | 639 (0.7%) | 622 (0.7%) | 0.971 (0.869–1.084) | 0.595 |
| Schizophrenia, schizotypal, delusional, and other non-mood psychotic disorders | 73 (<0.1%) | 117 (0.1%) | 0.590 (0.441–0.791) | <0.001 |
| Behavioral syndromes associated with physiological disturbances and physical factors | 536 (0.6%) | 376 (0.4%) | 1.337 (1.172–1.526) | <0.001 |
| Disorders of adult personality and behavior | 55 (<0.1%) | 41 (<0.1%) | 1.265 (0.844–1.896) | 0.253 |
| Intellectual Disabilities | 21 (<0.1%) | 20 (<0.1%) | 0.989 (0.536–1.824) | 0.971 |
| Pervasive and specific developmental disorders | 53 (<0.1%) | 27 (<0.1%) | 1.850 (1.164–2.940) | 0.008 |
| Bipolar disorder | 101 (0.1%) | 127 (0.1%) | 0.755 (0.581–0.981) | 0.034 |
| Major depressive disorder or depressive episode | 2,184 (2.4%) | 1,581 (1.7%) | 1.310 (1.228–1.398) | <0.001 |
| Behavioral and emotional disorders with onset usually occurring in childhood and adolescence | 252 (0.3%) | 157 (0.2%) | 1.515 (1.241–1.849) | <0.001 |

| eTable 3. Outcomes between patients with/without COVID-19 vaccination (18≤Age<40) | | | | |
| --- | --- | --- | --- | --- |
| Outcomes After Matching | Patients Who Received COVID-19 Vaccine (N=39,683) | Patients Who Did Not Receive COVID-19 Vaccine (N=39,683) | Adjusted Hazard Ratio (95% CI) | p-value |
| Mental, Behavioral and Neurodevelopmental disorders | 2,817 (7.1%) | 2,287 (5.8%) | 1.140 (1.078–1.204) | <0.001 |
| Mood [affective] disorders | 994 (2.5%) | 677 (1.7%) | 1.355 (1.229–1.494) | <0.001 |
| Anxiety, dissociative, stress-related, somatoform and other nonpsychotic mental disorders | 1,803 (4.5%) | 1,243 (3.1%) | 1.340 (1.247–1.441) | <0.001 |
| Mental disorders due to known physiological conditions | 48 (0.1%) | 48 (0.1%) | 1.000 (0.670–1.492) | 0.674 |
| Schizophrenia, schizotypal, delusional, and other non-mood psychotic disorders | 30 (<0.1%) | 54 (0.1%) | 0.520 (0.333–0.812) | 0.004 |
| Behavioral syndromes associated with physiological disturbances and physical factors | 269 (0.7%) | 209 (0.5%) | 1.175 (0.981–1.408) | 0.036 |
| Disorders of adult personality and behavior | 78 (0.2%) | 36 (0.1%) | 1.993 (1.343–2.958) | <0.001 |
| Intellectual Disabilities | 14 (<0.1%) | 15 (<0.1%) | 0.933 (0.451–1.933) | 0.689 |
| Pervasive and specific developmental disorders | 47 (0.1%) | 31 (<0.1%) | 1.400 (0.890–2.204) | 0.144 |
| Bipolar disorder | 49 (0.1%) | 60 (0.2%) | 0.760 (0.521–1.109) | 0.153 |
| Major depressive disorder or depressive episode | 912 (2.3%) | 583 (1.5%) | 1.442 (1.300–1.600) | <0.001 |
| Behavioral and emotional disorders with onset usually occurring in childhood and adolescence | 277 (0.7%) | 149 (0.4%) | 1.709 (1.400–2.085) | <0.001 |

| eTable 4. Outcomes between patients with/without COVID-19 vaccination (40≦Age<65) | | | | |
| --- | --- | --- | --- | --- |
| Outcomes After Matching | Patients Who Received COVID-19 Vaccine (N=40,802) | Patients Who Did Not Receive COVID-19 Vaccine (N=40,802) | Adjusted Hazard Ratio (95% CI) | p-value |
| Mental, Behavioral and Neurodevelopmental disorders | 2,640 (6.5%) | 2,418 (5.9%) | 1.034 (0.979–1.093) | 0.233 |
| Mood [affective] disorders | 920 (2.3%) | 676 (1.7%) | 1.291 (1.169–1.425) | <0.001 |
| Anxiety, dissociative, stress-related, somatoform and other nonpsychotic mental disorders | 1,440 (3.5%) | 1,143 (2.8%) | 1.192 (1.103–1.288) | <0.001 |
| Mental disorders due to known physiological conditions | 94 (0.2%) | 74 (0.2%) | 1.199 (0.884–1.626) | 0.242 |
| Schizophrenia, schizotypal, delusional, and other non-mood psychotic disorders | 50 (0.1%) | 55 (0.1%) | 0.864 (0.589–1.268) | 0.455 |
| Behavioral syndromes associated with physiological disturbances and physical factors | 198 (0.5%) | 133 (0.3%) | 1.394 (1.119–1.736) | 0.003 |
| Disorders of adult personality and behavior | 14 (<0.1%) | 22 (0.1%) | 0.604 (0.309–1.180) | 0.136 |
| Intellectual Disabilities | 15 (<0.1%) | 12 (<0.1%) | 1.185 (0.555–2.532) | 0.661 |
| Pervasive and specific developmental disorders | 29 (0.1%) | 14 (<0.1%) | 1.971 (1.042–3.730) | 0.034 |
| Bipolar disorder | 55 (0.1%) | 61 (0.2%) | 0.856 (0.595–1.232) | 0.403 |
| Major depressive disorder or depressive episode | 835 (2.0%) | 587 (1.4%) | 1.349 (1.214–1.499) | <0.001 |
| Behavioral and emotional disorders with onset usually occurring in childhood and adolescence | 92 (0.2%) | 60 (0.1%) | 1.448 (1.046–2.005) | 0.025 |

| eTable 5. Outcomes between patients with/without COVID-19 vaccination (Age≧65) | | | | |
| --- | --- | --- | --- | --- |
| Outcomes After Matching | Patients Who Received COVID-19 Vaccine (N=56,157) | Patients Who Did Not Receive COVID-19 Vaccine (N=56,157) | Adjusted Hazard Ratio (95% CI) | p-value |
| Mental, Behavioral, and Neurodevelopmental Disorders | 4,226 (7.53%) | 3,724 (6.63%) | 1.091 (1.044–1.14) | 0.0001 |
| Mood [Affective] Disorders | 1,369 (2.44%) | 1,018 (1.81%) | 1.294 (1.193–1.404) | <0.0001 |
| Anxiety, Dissociative, Stress-Related, and Other Nonpsychotic Disorders | 1,826 (3.25%) | 1,533 (2.73%) | 1.142 (1.067–1.222) | 0.0001 |
| Mental Disorders Due to Known Physiological Conditions | 955 (1.70%) | 856 (1.52%) | 1.068 (0.974–1.171) | 0.0610 |
| Schizophrenia and Other Non-Mood Psychotic Disorders | 62 (0.11%) | 98 (0.18%) | 0.605 (0.44–0.831) | 0.0017 |
| Behavioral Syndromes with Physiological Disturbances | 254 (0.45%) | 192 (0.34%) | 1.256 (1.041–1.515) | 0.0168 |
| Disorders of Adult Personality and Behavior | 21 (0.04%) | 24 (0.04%) | 0.831 (0.462–1.492) | 0.5785 |
| Intellectual Disabilities | ≤10 (0.018%) | ≤10 (0.018%) | 0.636 (0.18–2.256) | 0.4707 |
| Pervasive and Specific Developmental Disorders | 26 (0.05%) | 22 (0.04%) | 1.125 (0.638–1.985) | 0.0241 |
| Bipolar Disorder | 33 (0.06%) | 34 (0.06%) | 0.934 (0.578–1.507) | 0.4918 |
| Major Depressive Disorder or Depressive Episode | 1,270 (2.26%) | 935 (1.67%) | 1.307 (1.201–1.422) | <0.0001 |
| Behavioral and Emotional Disorders with Onset in Childhood | 34 (0.06%) | 29 (0.05%) | 1.129 (0.688–1.853) | 0.1684 |

| eTable 6. Outcomes between patients with/without COVID-19 vaccination without COVID-19 infection throughout lifetime | | | | | |
| --- | --- | --- | --- | --- | --- |
|  | Patients who received COVID-19 vaccine (N=145,346) | Patients who did not receive COVID-19 vaccine (N=145,346) | | Adjusted Hazard Ratio (95% CI) | p-value |
| Mental, Behavioral and Neurodevelopmental disorders | 10,218 (7.03%) | 8,725 (6.00%) | 1.11 (1.08, 1.14) | | <0.001 |
| Mood [affective] disorders | 3,440 (2.37%) | 2,450 (1.69%) | 1.30 (1.23, 1.36) | | <0.001 |
| Anxiety, dissociative, stress-related, somatoform and other nonpsychotic mental disorders | 5,223 (3.59%) | 3,983 (2.74%) | 1.23 (1.18, 1.29) | | <0.001 |
| Major depressive disorder or depressive episode | 3,161 (2.18%) | 2,162 (1.49%) | 1.34 (1.27, 1.41) | | <0.001 |
| Bipolar disorder | 155 (0.11%) | 184 (0.13%) | 0.84 (0.68, 1.04) | | 0.115 |
| Schizophrenia, schizotypal, delusional, and other non-mood psychotic disorders | 144 (0.10%) | 224 (0.15%) | 0.64 (0.52, 0.79) | | <0.001 |
| Mental disorders due to known physiological conditions | 1,154 (0.79%) | 1,022 (0.70%) | 1.05 (0.97, 1.15) | | 0.014 |
| Behavioral syndromes associated with physiological disturbances and physical factors | 700 (0.48%) | 537 (0.37%) | 1.31 (1.17, 1.46) | | <0.001 |
| Disorders of adult personality and behavior | 108 (0.07%) | 69 (0.05%) | 1.49 (1.11, 2.00) | | 0.008 |
| Intellectual Disabilities | 37 (0.03%) | 48 (0.03%) | 0.68 (0.45, 1.03) | | 0.064 |
| Pervasive and specific developmental disorders | 80 (0.06%) | 82 (0.06%) | 0.98 (0.72, 1.33) | | 0.594 |
| Behavioral and emotional disorders | 407 (0.28%) | 247 (0.17%) | 1.54 (1.32, 1.81) | | <0.001 |
| *Abbreviations: COVID-19: Coronavirus disease 2019, CI: confidence interval | | | | | |

| eTable 7. Outcomes between patients with/without COVID-19 vaccination (Global Collaborative Network) | | | | |
| --- | --- | --- | --- | --- |
| Outcomes After Matching | Patients Who Received COVID-19 Vaccine (N=147,973) | Patients Who Did Not Receive COVID-19 Vaccine (N=147,973) | Adjusted Hazard Ratio (95% CI) | p-value |
| Mental, Behavioral, and Neurodevelopmental Disorders | 10,468 (7.1%) | 8,733 (5.9%) | 1.14 (1.11–1.17) | <0.001 |
| Mood [Affective] Disorders | 3,508 (2.4%) | 2,470 (1.7%) | 1.35 (1.28–1.42) | <0.001 |
| Anxiety, Dissociative, Stress-Related, and Other Nonpsychotic Disorders | 5,348 (3.6%) | 3,875 (2.6%) | 1.31 (1.25–1.36) | <0.001 |
| Mental Disorders Due to Known Physiological Conditions | 1,245 (0.8%) | 1,116 (0.8%) | 1.05 (0.97–1.14) | 0.089 |
| Schizophrenia, Schizotypal, Delusional, and Other Non-Mood Psychotic Disorders | 167 (0.1%) | 241 (0.2%) | 0.66 (0.54–0.80) | <0.001 |
| Behavioral Syndromes with Physiological Disturbances | 719 (0.5%) | 528 (0.4%) | 1.27 (1.14–1.43) | <0.001 |
| Disorders of Adult Personality and Behavior | 105 (0.1%) | 83 (0.1%) | 1.19 (0.89–1.59) | 0.570 |
| Intellectual Disabilities | 40 (<0.1%) | 41 (<0.1%) | 0.92 (0.59–1.42) | 0.933 |
| Pervasive and Specific Developmental Disorders | 106 (0.1%) | 74 (<0.1%) | 1.35 (1.01–1.82) | 0.017 |
| Bipolar Disorder | 160 (0.1%) | 175 (0.1%) | 0.87 (0.70–1.08) | 0.195 |
| Major Depressive Disorder or Depressive Episode | 3,218 (2.2%) | 2,183 (1.5%) | 1.40 (1.32–1.48) | <0.001 |
| Behavioral and Emotional Disorders with Onset in Childhood | 402 (0.3%) | 245 (0.2%) | 1.64 (1.40–1.93) | <0.001 |

| eTable 8. Outcomes between patients with/without COVID-19 vaccination before COVID-19 infection | | | | |
| --- | --- | --- | --- | --- |
|  | Patients with history of COVID-19 infection | | | |
| Patients who received COVID-19 vaccine (N= 31,849) | Patients who did not receive COVID-19 vaccine (N= 31,849) | Adjusted Hazard Ratio (95% CI) | p-value |
| Mental, Behavioral and Neurodevelopmental disorders | 2,848 (8.9%) | 2,424 (7.6%) | 1.103 (1.045,1.165) | <0.001 |
| - Mood [affective] disorders | 951 (3.0%) | 700 (2.2%) | 1.273 (1.155,1.404) | <0.001 |
| - Anxiety, dissociative, stress-related disorders | 1,506 (4.7%) | 1,171 (3.7%) | 1.205 (1.117,1.301) | <0.001 |
| - Mental disorders due to known physiological conditions | 429 (1.3%) | 430 (1.3%) | 0.937 (0.82,1.071) | 0.340 |
| - Schizophrenia and related disorders | 28 (0.09%) | 49 (0.15%) | 0.538 (0.338,0.857) | 0.007 |
| - Behavioral syndromes | 239 (0.75%) | 184 (0.58%) | 1.208 (0.996,1.464) | 0.054 |
| - Disorders of adult personality and behavior | 15 (0.05%) | 16 (0.05%) | 0.874 (0.432,1.767) | 0.706 |
| - Intellectual Disabilities | ≤10 (0.03%) | ≤10 (0.03%) | 0.937 (0.352,2.496) | 0.896 |
| - Pervasive and specific developmental disorders | 21 (0.07%) | 22 (0.07%) | 0.888 (0.488,1.615) | 0.697 |
| - Bipolar disorder | 26 (0.08%) | 35 (0.11%) | 1.305 (1.177,1.447) | < 0.001 |
| - Major depressive disorder or depressive episode | 865 (2.7%) | 621 (2.0%) | 1.639 (1.197,2.244) | 0.098 |
| - Behavioral and emotional disorders (childhood onset) | 107 (0.34%) | 61 (0.19%) | 0.934 (0.328,2.663) | 0.898 |
| *Abbreviations: COVID-19: Coronavirus disease 2019, CI: confidence interval | | | | |
|  | | | | |


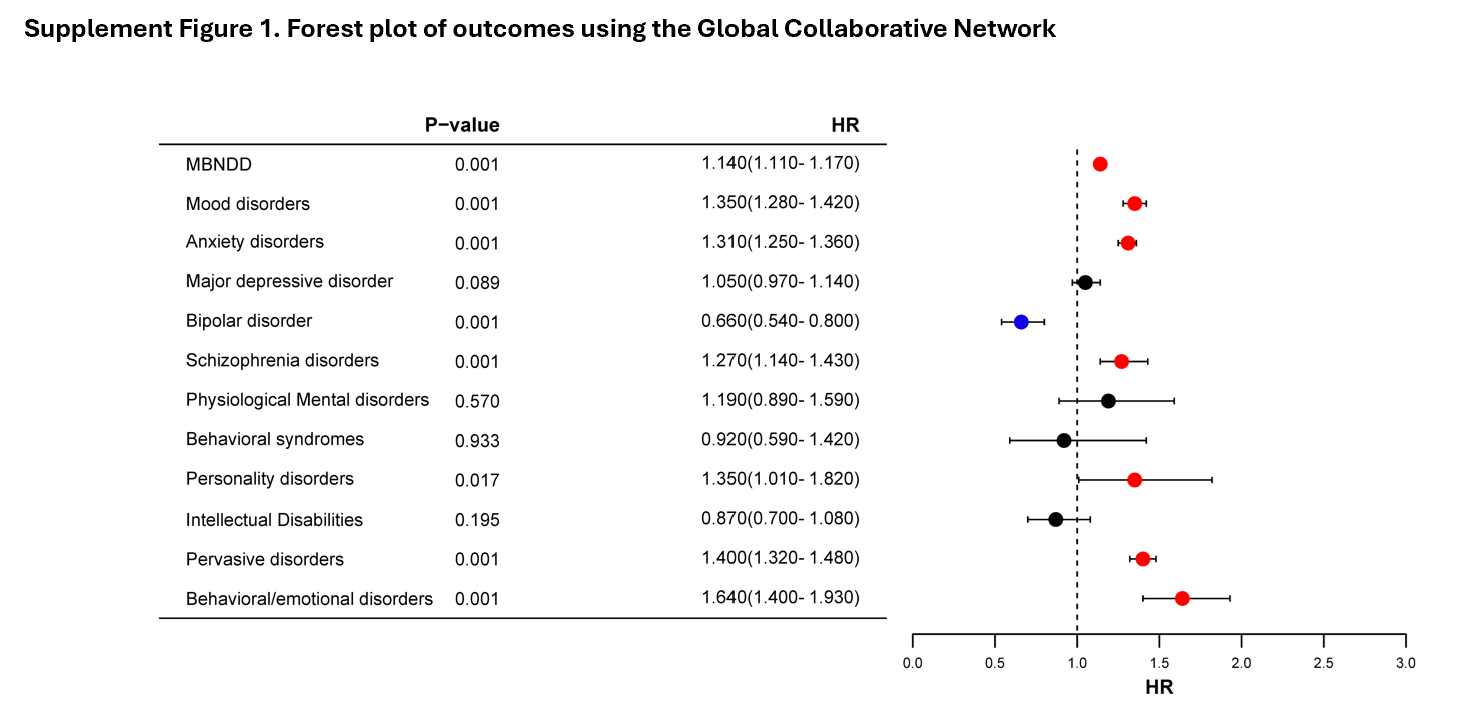
efigure 1. Forest plot of patients with/without COVID-19 vaccination (Global Collaborative Network), HR: hazard ratio
